# Supplementary material for: Factors Affecting Health Policies for Older People in Iran
Source: Research Square preprint supplement (doi:10.21203/rs.3.rs-148120/v1), 2021-01-27
Supplement: Supplementary file 1 [file e452182c3265a936138732f1.docx]

**Appendix 1: Interview guide**

Date and venue: Name and position of the interviewee:

1. Please explain your general perception of older people health policies in Iran.

2. How these policies enter the policy agenda? By whom (individuals, groups or organisations)?

3. How the policies are formulated and implemented?

4. What is your opinion about the implementation of the policies in the country?

5. Which financing policies were adopted in accordance with the related policies?

6. To what extent do you think the policies are properly implemented, and the aims are achieved?

7. Please, explain the strengths and weaknesses of the related policies. Which aspects of the policies need to be changed or improved?

8. To what extent do you think the policy was clear (in the content, objectives, expected results and outcomes)?

9. To what extent do you think the Iranian health system has the capacity for proper implementation of the policy? Which essentials should consider before the implementation of the policy?

10. In what extent do you think the implementation of the policies is based on evidence (local or global)?

11. What were the effects of the policies (positive and negative) on older people health?

15. So far, have you received any feedback from policy-makers and stakeholders, especially older people? Please discuss. How did you deal with these feedbacks?

16. Do you have any evidence to show how far the policy on older people health has been accepted by the stakeholders?

17. Would you please, give your opinion about whether the policies were successful or not?

18. As a final question, is there any further issue you would like to add?

Note: The questions were adjusted based on each interviewee’s position in the health system.
