# Supplementary material for: Factors Affecting Health Policies for Older People in Iran
Source: Research Square preprint supplement (doi:10.21203/rs.3.rs-148120/v1), 2021-01-27
Supplement: Supplementary file 3 [file 0bb0b2a707567154527b64c6.docx]

**Appendix 2: Focus Group Discussion Guide**

1. To what extent do you think older people’s health policies are properly implemented in the health system, and the aims are achieved? Do you have any evidence? Please explain more.

2. To what extent do you think the policies are based on knowledge of ‘‘what works”? Please explain.

3. In your opinion, to what extent do you think the financing mechanism of the related policies is interpreted comprehensively and objectives, functions and consequences were clear?

4. To what extent do you think our health system has the capacity for implementing the policy? Before the implementation of the policy, what actions and activities should implement in the health system and the country?

5. Do you think the implementation of the policies is based on evidence (local and global)? Please explain.

6. Please explain regarding positive and negative effects of the policies on older people health?

7. To what extent do you think the proper and complete implementation of the policy will be effective in dealing with the current challenges of older people health?
